# Supplementary material
Source: publisher figshare collection journal article supplement (https://aacr.figshare.com/articles/dataset/_/22472786)
Supplement: Supplementary file 1 [file 39924293]

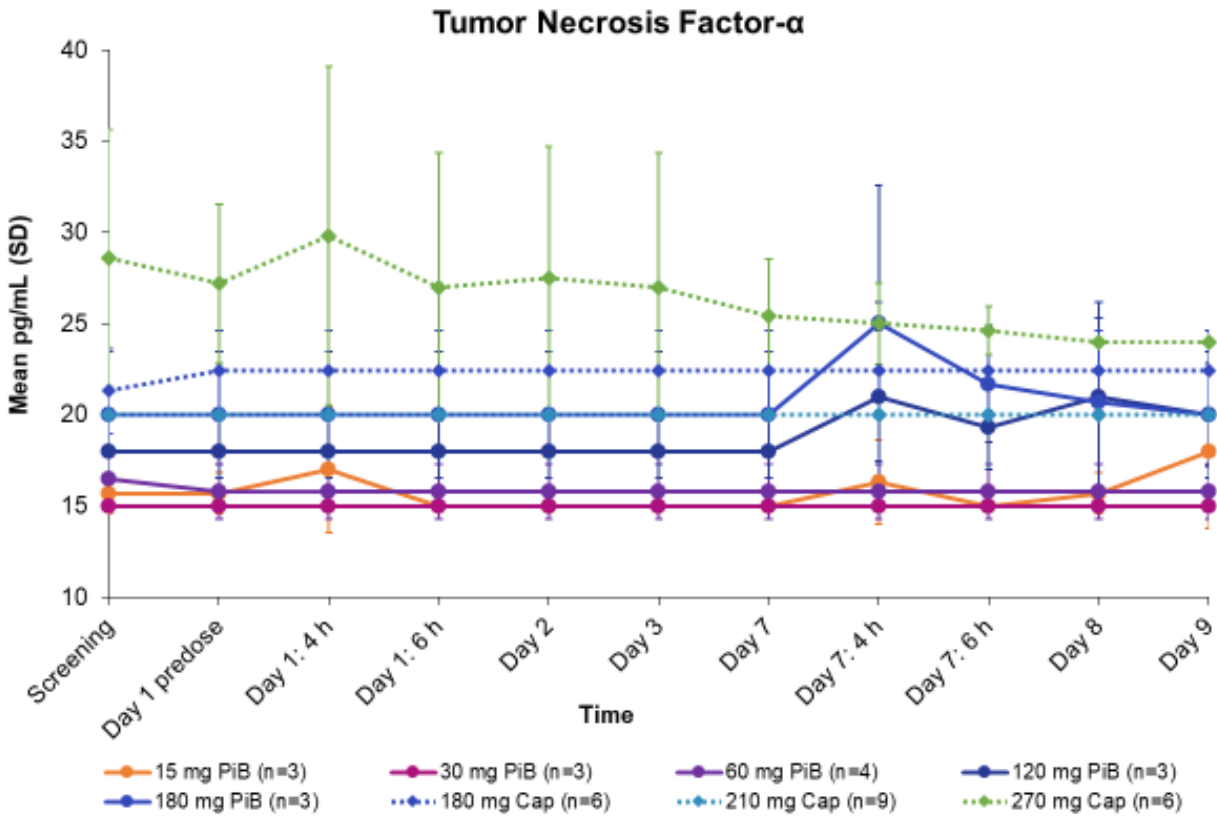

**Figure S5.**

Figure S5 shows changes in TNF $\alpha$  in plasma from screening thru day 9 at the indicated doses. Cap, capsule.
